# Supplementary material for: Neuroinflammation-targeted magnetic resonance imaging nanoprobes for the early diagnosis of Alzheimer's disease
Source: Royal Society of Chemistry journal article supplement (doi:10.1039/d4tb02210f), 2024-12-05
Supplement: d4tb02210f1.pdf [file d4tb02210f1.pdf]

## Supporting Information

### **Neuroinflammation-targeted magnetic resonance imaging nanoprobes for early diagnosis of Alzheimer's disease**

Yanjiao Jiang<sup>a</sup>, Wenyue Li<sup>a</sup>, Yuqiang Ma<sup>a</sup> and Yi Hou<sup>a,\*</sup>

<sup>a</sup>College of Life Science and Technology, Beijing University of Chemical Technology, Beijing,  
100029, China

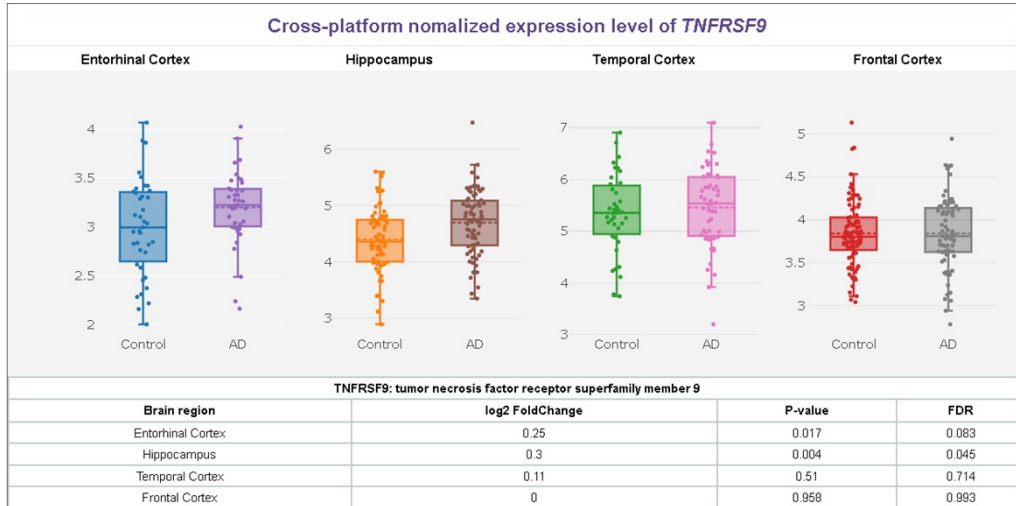

**Fig.S1** Analysis of CD137 gene expression results in alzdata database

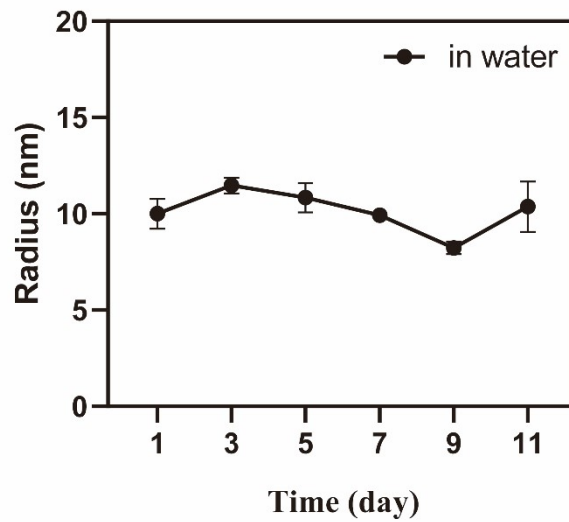

**Fig.S2** Temporal evolutions of the radius of pegylated NaGdF<sub>4</sub> nanoparticles in water

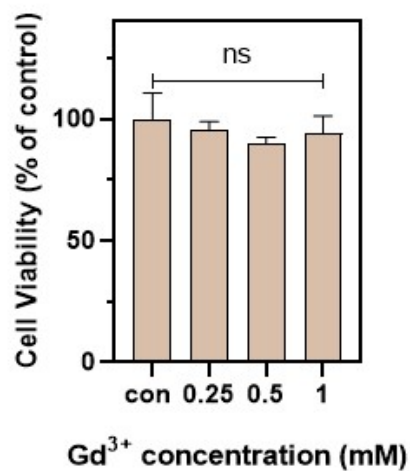

**Fig.S3** Cytotoxicity study of different concentrations of NP@angiopep-2/CD137 on BV2 cells

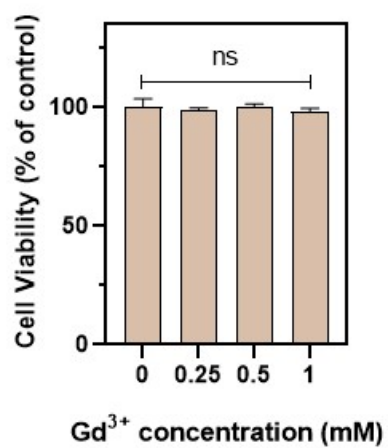

**Fig.S4** Cytotoxicity study of different concentrations of NP@angiopep-2/CD137 on U87 cells

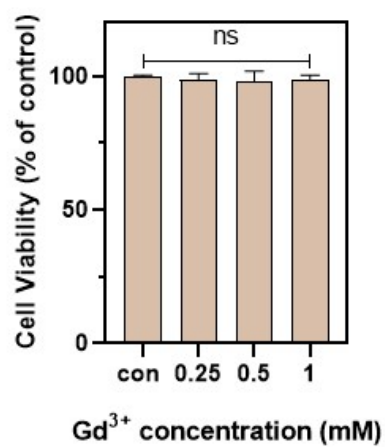

**Fig.S5** Cytotoxicity study of different concentrations of NP@angiopep-2/CD137 on SH-SY5Y cells
